# Supplementary material for: 4,4′-diaponeurosporene, a C30 carotenoid, effectively activates dendritic cells via CD36 and NF-κB signaling in a ROS independent manner
Source: PubMed Central journal article supplement (PMC5173036; doi:10.18632/oncotarget.9800), 2016-06-02
Supplement: oncotarget-07-40978-s001.pdf [file oncotarget-07-40978-s001.pdf]

# 4,4'-diaponeurosporene, a C<sub>30</sub> carotenoid, effectively activates dendritic cells *via* CD36 and NF- $\kappa$ B signaling in a ROS independent manner

Supplementary Material

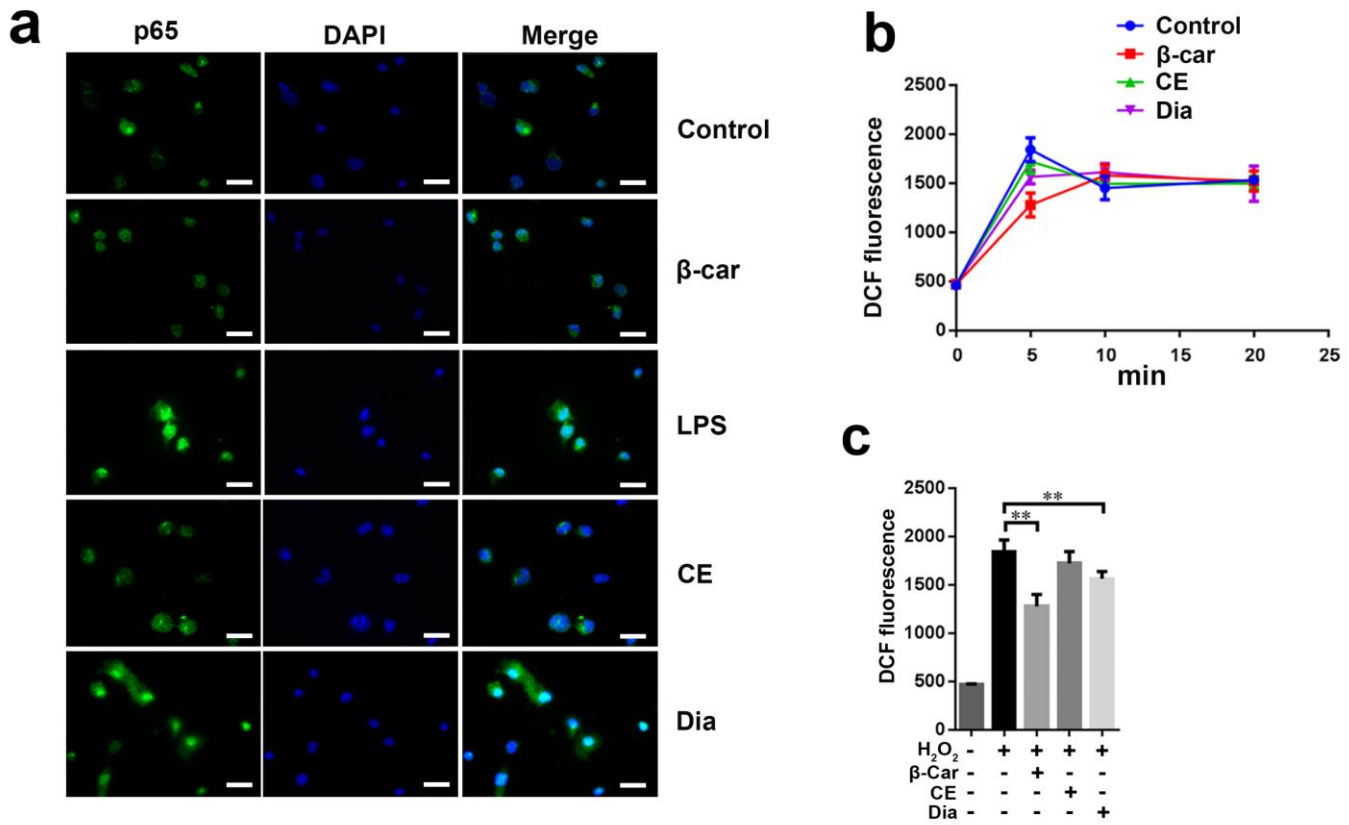

## Supplementary Fig. 1 Dia induced the phosphorylation of MAPKs and the activation of NF- $\kappa$ B in a ROS-independent manner.

(a) The activation of NF- $\kappa$ B by Dia was also testified by the nuclear translocation of p65. p65 (green), DNA (blue). Scale bar = 30  $\mu$ m. (b) Dia and  $\beta$ -carotene could reduce the hydrogen peroxide induced oxidative stress in DCs. Hydrogen peroxide alone or combined with  $\beta$ -carotene (1  $\mu$ M), CE (equal volume to Dia), or Dia (1  $\mu$ M) were added into DCs culture. At different time points, cells were harvested and stained with DCFDA and analyzed by FACS. (c) The statistical result at 5 min point in (f) is shown.
